# Supplementary material
Source: PubMed Central journal article supplement (PMC4824295)
Supplement: NIHMS763816-supplement-Supplemental.pdf [file NIHMS763816-supplement-Supplemental.pdf]

**Supplementary Table S1. Primer sets used in this study**

| Gene ID                                                               | Forward Primer Sequence<br>Reverse Primer Sequence             | Note                                                               |
|-----------------------------------------------------------------------|----------------------------------------------------------------|--------------------------------------------------------------------|
| <i>For quantitative reverse-transcription real-time PCR (qRT-PCR)</i> |                                                                |                                                                    |
| GAPDH                                                                 | 5' -CAGCAAGAGCACAAGAGGAA-3'<br>5' -TCTACATGGCAACTGTGAGGAG-3'   | Loading control                                                    |
| MYC                                                                   | 5' -ACGTCTCCACACATCAGCAC-3'<br>5' -CGCCTCTTGACATTCTCCTC-3'     |                                                                    |
| p21                                                                   | 5' -CATGTGGACCTGTCACTGTCTT-3'<br>5' -GGATTAGGGCTTCCTCTTGG-3'   |                                                                    |
| RUNX2                                                                 | 5' -TCTGACCGCCTCAGTGATTT-3'<br>5' -TGTAATCTGACTCTGTCCTTGTGG-3' |                                                                    |
| <i>For Chromatin Immunoprecipitation (ChIP)</i>                       |                                                                |                                                                    |
| 2q24                                                                  | 5' -GCAATCCTGAGCGGACATAC-3'<br>5' -CCTGCTGCACTCTTGACCT-3'      | Loading Control 1:<br>Genomic region with no<br>copy number change |
| RUNX2<br>+1L                                                          | 5' -TCACTACCAGCCACCGAGA-3'<br>5' -GGCTCACGTCGCTCATTT-3'        | Transcription start site II<br>(TSS II)                            |
| RUNX2<br>+1S                                                          | 5' -CCTCCTTGCCCCTCATTT-3'<br>5' -GGCTCACGTCGCTCATTT-3'         | Transcription start site I<br>(TSS I)                              |
| RUNX2<br>-250L                                                        | 5' -TACAGGAGTTTGGGCTCCTTC-3'<br>5' -CTTTTCCCCCTTGCTCTTTC-3'    | 250 bp upstream of<br>TSS II                                       |
| RUNX2<br>-250S                                                        | 5' -CGACTTACCTCTTGGCACCTT-3'<br>5' -CTGCACGCTCAGATTCCTC-3'     | 250 bp upstream of<br>TSS I                                        |
| RUNX2<br>-5KL                                                         | 5' -TTAAACCTTCAACAACCTCCTTT-3'<br>5' -TTCATGTTAATGGCTTGCTCT-3' | Loading Control II: 5000<br>bp upstream of TSS II                  |
| RUNX2<br>-5KS                                                         | 5' -CTCTTGTTACAGCCATGCAAA-3'<br>5' -CCAACTGTGTTGCACATGATTAC-3' | Loading Control III:<br>5000 bp upstream of<br>TSS I               |
| RUNX2<br>H3KAc27-2                                                    | 5' -TCAAGTGGACCAGGGTTTTG-3'<br>5' -CTCCGATGACCACTTTAGGA-3'     | H3KAc27 histone<br>acetylation site 2                              |
| RUNX2<br>H3KAc27-3                                                    | 5' -GTGTCCCTCCTTTGCACTCT-3'<br>5' -GCATGTGGAAACTGTGCTCT-3'     | H3KAc27 histone<br>acetylation site 3                              |

**Supplementary Table S2. Antibodies used in this study.**

| <b>Antibody</b>                                 | <b>Phosphorylation Site</b> | <b>Company</b> | <b>Catalog No</b> |
|-------------------------------------------------|-----------------------------|----------------|-------------------|
| <i>For Western blotting</i>                     |                             |                |                   |
| GAPDH                                           |                             | Santa Cruz     | sc-47724          |
| c-MYC                                           |                             | Santa Cruz     | sc-40             |
| SIRT1                                           |                             | Santa Cruz     | sc-15404          |
| p21                                             |                             | Cell Signaling | 2946              |
| Phospho-S6K                                     | Thr389                      | Cell Signaling | 9205              |
| PARP                                            |                             | Cell Signaling | 9532              |
| Phospho-c-JUN                                   | Ser63                       | Santa Cruz     | sc-822            |
| c-FOS                                           |                             | Santa Cruz     | sc-52             |
| Phospho-JAK2                                    | Tyr1007/1008                | Cell Signaling | 3776              |
| Phospho-JAK3                                    | Tyr980/981                  | Cell Signaling | 5031              |
| Phospho-STAT3                                   | Tyr705                      | Cell Signaling | 9131              |
| Phospho-STAT5                                   | Tyr694                      | Cell Signaling | 9356              |
| caspase-3                                       |                             | Cell Signaling | 9668              |
| caspase-7                                       |                             | Cell Signaling | 9502              |
| caspase-8                                       |                             | Cell Signaling | 9746              |
| caspase-9                                       |                             | Santa Cruz     | sc-6138           |
| <i>For Chromatin Immunoprecipitation (ChIP)</i> |                             |                |                   |
| BRD4                                            |                             | Bethyl Lab     | A301-985A50       |

**Supplementary Table S3. Concentration ratio of JQ1 and rapamycin used in the drug combination study.** ID numbers correspond to the point numbers in isobolograms in Figure 4C. ND = not done.

| ID | MNNG/HOS       |                | SJSA           |                |
|----|----------------|----------------|----------------|----------------|
|    | JQ1 ( $\mu$ M) | rapamycin (nM) | JQ1 ( $\mu$ M) | rapamycin (nM) |
| 1  | 0.78           | 1.51           | 1.51           | 3.13           |
| 2  | 0.78           | 3.13           | 1.51           | 6.25           |
| 3  | 0.78           | 6.25           | 1.51           | 12.50          |
| 4  | 0.78           | 12.50          | 1.51           | 25.00          |
| 5  | 1.51           | 1.51           | 1.51           | 50.00          |
| 6  | 1.51           | 3.13           | 3.13           | 3.13           |
| 7  | 1.51           | 6.25           | 3.13           | 6.25           |
| 8  | 1.51           | 12.50          | 3.13           | 12.50          |
| 9  | 3.13           | 1.51           | 3.13           | 25.00          |
| 10 | 3.13           | 3.13           | 3.13           | 50.00          |
| 11 | 3.13           | 6.25           | 6.25           | 3.13           |
| 12 | 3.13           | 12.50          | 6.25           | 6.25           |
| 13 | 6.25           | 1.51           | 6.25           | 12.50          |
| 14 | 6.25           | 3.13           | 6.25           | 25.00          |
| 15 | 6.25           | 6.25           | 6.25           | 50.00          |
| 16 | 6.25           | 12.50          | 12.50          | 3.13           |
| 17 | 12.50          | 1.51           | 12.50          | 6.25           |
| 18 | 12.50          | 3.13           | 12.50          | 12.50          |
| 19 | 12.50          | 6.25           | 12.50          | 25.00          |
| 20 | 12.50          | 12.50          | 12.50          | 50.00          |
| 21 | 25.00          | 1.51           | 25.00          | 3.13           |
| 22 | 25.00          | 3.13           | 25.00          | 6.25           |
| 23 | 25.00          | 6.25           | 25.00          | 12.50          |
| 24 | 25.00          | 12.50          | 25.00          | 25.00          |
| 25 | ND             | ND             | 25.00          | 50.00          |

**Supplementary Table S4. Significantly downregulated genes in JQ1-treated cells vs. control.**

MNNG/HOS cells were treated with JQ1 (7.5  $\mu$ M), rapamycin (12.5 nM), or both for 6 h and subjected to microarray analysis. Among differentially expressed genes (DEGs), those significantly downregulated in JQ1-treated cells are ranked according to the log<sub>2</sub> ratio of gene expression level in JQ1-treated cells compared to gene expression level in DMSO-treated control. Genes with ratio of -2 or lower are shown. The position of RUNX2 is highlighted in yellow.

| RANK | SYMBOL       | ENTREZ_GENE_ID | log2 JQ1/Ctrl |
|------|--------------|----------------|---------------|
| 1    | RIN2         | 54453          | -4.092148585  |
| 2    | IL7R         | 3575           | -3.92117468   |
| 3    | KCNF1        | 3754           | -3.719257132  |
| 4    | IL7R         | 3575           | -3.70296854   |
| 5    | ZMYND8       | 23613          | -3.691144216  |
| 6    | ZMYND8       | 23613          | -3.58703991   |
| 7    | WNT5A        | 7474           | -3.550375313  |
| 8    | C15orf52     | 388115         | -3.538340925  |
| 9    | KLHL14       | 57565          | -3.466262418  |
| 10   | TNFRSF11B    | 4982           | -3.272617415  |
| 11   | PSCDBP       | 9595           | -3.226055228  |
| 12   | PIGC         | 5279           | -3.217367635  |
| 13   | CH25H        | 9023           | -3.047854426  |
| 14   | DCLRE1A      | 9937           | -3.035346585  |
| 15   | CSF2         | 1437           | -3.027063714  |
| 16   | CHRNA9       | 55584          | -2.990436969  |
| 17   | ZNF586       | 54807          | -2.969226857  |
| 18   | GPR81        | 27198          | -2.966484586  |
| 19   | C21orf63     | 59271          | -2.966446172  |
| 20   | E2F2         | 1870           | -2.897758158  |
| 21   | LYPD1        | 116372         | -2.890716213  |
| 22   | SHROOM2      | 357            | -2.867196133  |
| 23   | NUAK1        | 9891           | -2.849689676  |
| 24   | WNT7B        | 7477           | -2.84927751   |
| 25   | KRT80        | 144501         | -2.831350867  |
| 26   | RASL10A      | 10633          | -2.827005919  |
| 27   | BCL3         | 602            | -2.821717989  |
| 28   | SOX21        | 11166          | -2.815924038  |
| 29   | CLCF1        | 23529          | -2.815777088  |
| 30   | TRIB2        | 28951          | -2.796699998  |
| 31   | ZNF827       | 152485         | -2.784693885  |
| 32   | OTUB2        | 78990          | -2.777207795  |
| 33   | ARL14        | 80117          | -2.727708179  |
| 34   | PHF15        | 23338          | -2.688054101  |
| 35   | CDCP1        | 64866          | -2.679191408  |
| 36   | ZNF586       | 54807          | -2.664450479  |
| 37   | LOC100216001 | 100216001      | -2.640809887  |
| 38   | C1orf106     | 55765          | -2.622366147  |
| 39   | PIGC         | 5279           | -2.619634504  |
| 40   | SLC16A6      | 9120           | -2.604624355  |
| 41   | FAM109B      | 150368         | -2.602747683  |
| 42   | CCDC102A     | 92922          | -2.586393799  |

|                 |            |                     |
|-----------------|------------|---------------------|
| 43 RASL12       | 51285      | -2.583817136        |
| 44 TMEM156      | 80008      | -2.582348799        |
| 45 STAMBPL1     | 57559      | -2.520267239        |
| 46 HOXA2        | 3199       | -2.518485708        |
| 47 MEIS2        | 4212       | -2.507727949        |
| 48 ZNF365       | 22891      | -2.494896233        |
| 49 NUAK1        | 9891       | -2.492668761        |
| 50 MBP          | 4155       | -2.47567176         |
| 51 LRRN3        | 54674      | -2.459340453        |
| 52 C16orf30     | 79652      | -2.451614536        |
| 53 TRIB3        | 57761      | -2.441376083        |
| 54 ACOT4        | 122970     | -2.438143334        |
| 55 MMACHC       | 25974      | -2.436182863        |
| 56 SH3RF2       | 153769     | -2.428049225        |
| 57 LOC100134073 | 100134073  | -2.424971825        |
| 58 GPR68        | 8111       | -2.420483805        |
| 59 SPRY1        | 10252      | -2.413695733        |
| 60 TOMM40L      | 84134      | -2.409498866        |
| 61 NME6         | 10201      | -2.408962335        |
| 62 HAS2         | 3037       | -2.403004982        |
| 63 GREM1        | 26585      | -2.394335179        |
| 64 PRDM10       | 56980      | -2.394076176        |
| 65 FAM176A      | 84141      | -2.379910336        |
| 66 SPRY1        | 10252      | -2.376294982        |
| 67 ARID2        | 196528     | -2.374576522        |
| <b>68 RUNX2</b> | <b>860</b> | <b>-2.370703936</b> |
| 69 DKK1         | 22943      | -2.367125021        |
| 70 HOXA2        | 3199       | -2.348330668        |
| 71 SOX2         | 6657       | -2.348291893        |
| 72 PTHLH        | 5744       | -2.341577334        |
| 73 L3MBTL3      | 84456      | -2.33117637         |
| 74 CHMP6        | 79643      | -2.321825037        |
| 75 IRX4         | 50805      | -2.321716365        |
| 76 TMEM166      | 84141      | -2.313704023        |
| 77 KIAA1333     | 55632      | -2.301177069        |
| 78 CCRK         | 23552      | -2.294081999        |
| 79 IRS1         | 3667       | -2.287137125        |
| 80 CDC42EP1     | 11135      | -2.257127921        |
| 81 PLCL2        | 23228      | -2.255246569        |
| 82 KIAA0753     | 9851       | -2.244058663        |
| 83 ABCA1        | 19         | -2.234814999        |
| 84 FAM174B      | 400451     | -2.22553054         |
| 85 NME6         | 10201      | -2.217212699        |
| 86 USP21        | 27005      | -2.199877641        |
| 87 ZFP112       | 7771       | -2.199332591        |
| 88 PLD6         | 201164     | -2.197773804        |
| 89 C17orf100    | 388327     | -2.184385786        |
| 90 HOXC9        | 3225       | -2.182666652        |
| 91 PFAAP5       | 10443      | -2.179490397        |
| 92 UQCR         | 10975      | -2.171227943        |
| 93 BNIP1        | 662        | -2.165496148        |
| 94 LRFN4        | 78999      | -2.165296854        |

|               |        |              |
|---------------|--------|--------------|
| 95 GPRC5C     | 55890  | -2.160979937 |
| 96 C9orf64    | 84267  | -2.151883313 |
| 97 ZNF689     | 115509 | -2.147001719 |
| 98 SFMBT1     | 51460  | -2.141236613 |
| 99 TMEM156    | 80008  | -2.138354315 |
| 100 FOXA2     | 3170   | -2.13571766  |
| 101 LOC730525 | 730525 | -2.127931712 |
| 102 HOXA10    | 3206   | -2.12126226  |
| 103 RG9MTD3   | 158234 | -2.112530199 |
| 104 PTHLH     | 5744   | -2.110597205 |
| 105 EDARADD   | 128178 | -2.107474541 |
| 106 IL1RAPL1  | 11141  | -2.094175708 |
| 107 FAM50B    | 26240  | -2.090266317 |
| 108 ZNF323    | 64288  | -2.087979724 |
| 109 HMGA2     | 8091   | -2.087670102 |
| 110 RIPPLY2   | 134701 | -2.085783283 |
| 111 HOXC8     | 3224   | -2.080610309 |
| 112 ELFN2     | 114794 | -2.06967568  |
| 113 VEGFC     | 7424   | -2.068131701 |
| 114 TSPYL3    | 128854 | -2.062710885 |
| 115 ARID2     | 196528 | -2.062269137 |
| 116 C19orf12  | 83636  | -2.056408866 |
| 117 RXRA      | 6256   | -2.053874538 |
| 118 ZFHX3     | 463    | -2.052255426 |
| 119 SCHIP1    | 29970  | -2.050903463 |
| 120 ELF2      | 1998   | -2.048195781 |
| 121 PHOSPHO2  | 493911 | -2.046147291 |
| 122 ZNF573    | 126231 | -2.045996162 |
| 123 IL28RA    | 163702 | -2.042259309 |
| 124 NEK6      | 10783  | -2.042104516 |
| 125 GMEB1     | 10691  | -2.041652796 |
| 126 IRAK3     | 11213  | -2.040076632 |
| 127 ZNF248    | 57209  | -2.03729212  |
| 128 ZFP64     | 55734  | -2.034323054 |
| 129 UNC50     | 25972  | -2.031883093 |
| 130 KCTD14    | 65987  | -2.021823568 |
| 131 NEXN      | 91624  | -2.020985309 |
| 132 WDR4      | 10785  | -2.019857938 |
| 133 FAM176A   | 84141  | -2.019339471 |
| 134 TMEM204   | 79652  | -2.019084788 |
| 135 THUMPD3   | 25917  | -2.017595711 |

---

**Supplementary Table S5. Significantly upregulated genes in JQ1-treated cells vs. control.** MNNG/HOS cells were treated with JQ1 (7.5  $\mu$ M), rapamycin (12.5 nM), or both for 6 h and subjected to microarray analysis. Among differentially expressed genes (DEGs), those significantly upregulated in JQ1-treated cells are ranked according to the log<sub>2</sub> ratio of gene expression level in JQ1-treated cells compared to gene expression level in DMSO-treated control. Genes with ratio of 2 or higher are shown. The position of p21 (CDKN1A) is highlighted in yellow.

| RANK | SYMBOL       | ENTREZ_GENE_ID | log2 JQ1/Ctrl |
|------|--------------|----------------|---------------|
| 1    | FGFR3        | 2261           | 3.973535301   |
| 2    | LMO2         | 4005           | 3.696380122   |
| 3    | FOS          | 2353           | 3.631029668   |
| 4    | ARC          | 23237          | 3.537490533   |
| 5    | HIST1H2BD    | 3017           | 3.342158837   |
| 6    | TXNIP        | 10628          | 3.259420968   |
| 7    | HES6         | 55502          | 3.101914333   |
| 8    | CRISPLD2     | 83716          | 3.059225419   |
| 9    | MARCH3       | 115123         | 2.983932173   |
| 10   | SERPINI1     | 5274           | 2.982531459   |
| 11   | METRNL       | 284207         | 2.933443418   |
| 12   | HIST2H4A     | 8370           | 2.873400264   |
| 13   | ZFP36        | 7538           | 2.83986895    |
| 14   | HIST1H2BD    | 3017           | 2.83977155    |
| 15   | PPP1R13B     | 23368          | 2.831797532   |
| 16   | SERTAD1      | 29950          | 2.820421633   |
| 17   | FAM46C       | 54855          | 2.806971275   |
| 18   | CTGF         | 1490           | 2.795179074   |
| 19   | GCH1         | 2643           | 2.736704706   |
| 20   | HIST2H2BE    | 8349           | 2.696665348   |
| 21   | HIST2H4B     | 554313         | 2.671971803   |
| 22   | CDKN1A       | 1026           | 2.662644165   |
| 23   | MERTK        | 10461          | 2.638666174   |
| 24   | FZD9         | 8326           | 2.612581327   |
| 25   | MARCH3       | 115123         | 2.602913932   |
| 26   | C1orf124     | 83932          | 2.593468877   |
| 27   | KIAA1683     | 80726          | 2.545875435   |
| 28   | IRF7         | 3665           | 2.535118396   |
| 29   | KCNK12       | 56660          | 2.497182187   |
| 30   | GLS          | 2744           | 2.459447038   |
| 31   | LOC648164    | 648164         | 2.456782629   |
| 32   | METRNL       | 284207         | 2.446016489   |
| 33   | TUFT1        | 7286           | 2.431334717   |
| 34   | HIST1H2BG    | 8339           | 2.428113897   |
| 35   | LOC100133609 | 100133609      | 2.412090776   |
| 36   | PELI1        | 57162          | 2.405895428   |
| 37   | CTGF         | 1490           | 2.399297795   |
| 38   | BAIAP2       | 10458          | 2.386815135   |
| 39   | DACT3        | 147906         | 2.372508049   |
| 40   | RASD1        | 51655          | 2.372201292   |
| 41   | CHCHD7       | 79145          | 2.352793862   |

|                 |           |             |
|-----------------|-----------|-------------|
| 42 HIST1H2AC    | 8334      | 2.341376436 |
| 43 HSPA2        | 3306      | 2.325390118 |
| 44 SLC30A3      | 7781      | 2.324112089 |
| 45 HIST1H3G     | 8355      | 2.311199287 |
| 46 HSPA2        | 3306      | 2.302839838 |
| 47 KBTBD9       | 114818    | 2.301358687 |
| 48 HIST1H3H     | 8357      | 2.279922294 |
| 49 ADARB1       | 104       | 2.268314194 |
| 50 NPTX2        | 4885      | 2.266003732 |
| 51 GCH1         | 2643      | 2.234991108 |
| 52 SLC6A8       | 6535      | 2.224829048 |
| 53 B3GNT2       | 10678     | 2.209458483 |
| 54 HIST1H3D     | 8351      | 2.186439887 |
| 55 LOC649679    | 649679    | 2.179136833 |
| 56 HIST1H2AG    | 8969      | 2.173989433 |
| 57 GRM2         | 2912      | 2.164843419 |
| 58 CSRNP2       | 81566     | 2.156020479 |
| 59 LOC100129907 | 100129907 | 2.147408872 |
| 60 PPP2R2B      | 5521      | 2.140786247 |
| 61 MAFB         | 9935      | 2.133603564 |
| 62 CASZ1        | 54897     | 2.128990836 |
| 63 METRNL       | 284207    | 2.126617893 |
| 64 HSPA12A      | 259217    | 2.100170803 |
| 65 WDR47        | 22911     | 2.09019125  |
| 66 MT1X         | 4501      | 2.084063745 |
| 67 TRIM36       | 55521     | 2.07962244  |
| 68 HSPA1A       | 3303      | 2.063880928 |
| 69 RRAD         | 6236      | 2.06021117  |
| 70 MGC61598     | 441478    | 2.05274149  |
| 71 PEG10        | 23089     | 2.050900521 |
| 72 IL11         | 3589      | 2.04726304  |
| 73 SLC6A10P     | 386757    | 2.046182421 |
| 74 TUBB4Q       | 56604     | 2.0348669   |
| 75 STARD5       | 80765     | 2.022056802 |
| 76 CORO1A       | 11151     | 2.021619824 |
| 77 MKNK2        | 2872      | 2.019313893 |
| 78 LOC653506    | 653506    | 2.019166814 |
| 79 AMACR        | 23600     | 2.015237947 |
| 80 PLEKHO2      | 80301     | 2.000865846 |

---



**Supplementary Table S6. Significantly downregulated genes in JQ1 and rapamycin-treated cells vs. JQ1-treated cells.** MNNG/HOS cells were treated with JQ1 (7.5  $\mu$ M), rapamycin (12.5 nM), or both for 6 h and subjected to microarray analysis. Among differentially expressed genes (DEGs), those significantly downregulated in JQ1 and rapamycin-treated cells are ranked according to the log<sub>2</sub> ratio of gene expression level in JQ1 and rapamycin-treated cells compared to gene expression level in JQ-treated cells. Genes with ratio of -2 or lower are shown. Only one gene met the criteria.

| <b>RANK</b> | <b>SYMBOL</b> | <b>ENTREZ_GENE_ID</b> | <b>log2 (JQ1+rapamycin)/JQ1</b> |
|-------------|---------------|-----------------------|---------------------------------|
| 1           | LOC653375     | 653375                | -2.143630169                    |

**Supplementary Table S7. Significantly upregulated genes in JQ1 and rapamycin-treated cells vs. JQ1-treated cells.** MNNG/HOS cells were treated with JQ1 (7.5  $\mu$ M), rapamycin (12.5 nM), or both for 6 h and subjected to microarray analysis. Among differentially expressed genes (DEGs), those significantly upregulated in JQ1 and rapamycin-treated cells are ranked according to the log<sub>2</sub> ratio of gene expression level in JQ1 and rapamycin-treated cells compared to gene expression level in JQ-treated cells. Genes with ratio of 2 or higher are shown.

| RANK | SYMBOL   | ENTREZ_GENE_ID | log <sub>2</sub> (JQ1+rapamycin)/JQ1 |
|------|----------|----------------|--------------------------------------|
| 1    | DDIT3    | 1649           | 3.622533331                          |
| 2    | RCAN1    | 1827           | 2.992555073                          |
| 3    | FBXO32   | 114907         | 2.615711453                          |
| 4    | MT1H     | 4496           | 2.504426997                          |
| 5    | SCARNA23 | 677773         | 2.464839341                          |
| 6    | PIM1     | 5292           | 2.363368461                          |
| 7    | TRIB3    | 57761          | 2.357321024                          |
| 8    | HBP1     | 26959          | 2.331455212                          |
| 9    | ATF3     | 467            | 2.304204638                          |
| 10   | C5orf41  | 153222         | 2.243318829                          |
| 11   | KLHL24   | 54800          | 2.21134671                           |
| 12   | GEM      | 2669           | 2.199837007                          |
| 13   | MT1M     | 4499           | 2.177666136                          |
| 14   | MT1E     | 4493           | 2.164168459                          |
| 15   | GEM      | 2669           | 2.126787166                          |
| 16   | FBXO32   | 114907         | 2.125135898                          |
| 17   | SESN2    | 83667          | 2.094470304                          |
| 18   | MT1G     | 4495           | 2.09191185                           |
| 19   | MIR330   | 442902         | 2.070090675                          |
| 20   | INSIG1   | 3638           | 2.05617522                           |
| 21   | IL8      | 3576           | 2.045354136                          |
